# Supplementary material
Source: Elsevier journal article supplement (https://www.sciencedirect.com/science/article/pii/S0001651920302004)
Supplement: mmc1 [file S0001651920302004:mmc1.doc]

**Tabla:**

| Preguntas | N | % |
| --- | --- | --- |
| Nivel de formación  1er o 2do año de residencia  3er o 4to año de residencia  Adjunto <5 años de experiencia  Adjunto con >5 años de experiencia | 1  9  13  27 | 3.7  14.81  33.33  48.15 |
| ¿Has hecho algún entrenamiento previo en sialoendoscopia?  Sí  No | 8  19 | 29.63  70.37 |
| Antes de asistir al curso, ¿habías usado un sialoendoscopio?  Sí  No | 9  18 | 33.33  66.67 |
| ¿Considera que la práctica con esferas de Omeprazol representa fielmente la técnica de capturar de litiasis flotante?  Sí  No | 26  1 | 96.3  3.7 |
| ¿La práctica ha sido útil para entender el uso de las fundas de acceso vascular en el abordaje del conducto salivar?  Sí  No | 27  0 | 100  0 |
| ¿Ha podido establecer un puerto de acceso estable que le permita navegar y operar dentro del conducto salivado?  Sí  No | 26  1 | 96.3  3.7 |
| ¿Considera que el protocolo de práctica para la extracción de esferas de omeprazol es claro y reproducible?  Sí  No | 27  0 | 100  0 |
| ¿Has sido capaz de capturar las esferas de omeprazol usando la cesta de Dormia?  Sí  No | 27  0 | 100  0 |
| ¿Crees que en una situación clínica similar, serías capaz de extraerla?  Sí  No | 27  0 | 100  0 |
| ¿Es adecuado el material para la práctica: ¿kit de acceso vascular, cápsula de omeprazol y cesta Dormia?  Sí  No | 27  0 | 100  0 |
| ¿El hecho de haber hecho esta práctica cambiará o mejorará la forma en que trata las litiasis salivales flotante?  Sí  No | 27  0 | 100  0 |
| Tasa de satisfacción global | 92.25 | |

**Tabla Suplementaria 1**. Cuestionario y datos de entrenamiento con Omepralith.
